# Supplementary material for: Semi-analytical approach to study the role of abyssal stratification in the propagation of potential vorticity in a four-layer ocean basin
Source: Copernicus journal article supplement (doi:10.5194/egusphere-2024-1580), 2024-06-04
Supplement: Supplementary file [file egusphere-2024-1580-RC1-supplement.pdf]

- The title is misleading: the approach is not semi-analytical. It is a numerical model. I am also uneasy with the notion of vertical propagation on PV when the latter is materially conserved in absence of diffusion and that there is no vertical advection in QG.
- I am uneasy with the justification of the equations using the depth  $z$  instead of  $\rho$ , as the justification (based on crude finite difference) differs significantly from the rigorous derivation (based on vertical averaging, see e.g. [1]) of layered models. There must be other ways to justify the change (such as arguing that at the relevant order in  $Ro$ , isopycnals are flat - corrections only dynamically matter at higher order in  $Ro$ ).
- line 145: the statement is technically erroneous.  $\partial\psi/\partial z$  in equation (2) is a rescaled buoyancy anomaly. The vertical velocity is proportional to the material derivative of this buoyancy anomaly. So, although  $\partial\psi/\partial z = 0$  implies no vertical velocity, the reciprocal is not true: no vertical velocity does not imply  $\partial\psi/\partial z = 0$ .
- Please clarify where equation (5) comes from.
- Equation (12) is unnecessarily general since only  $U_1 \neq 0$ . It would be simpler to just define  $\bar{\psi}_1$  in equation (12) and state in the text that  $\bar{\psi}_j$ ,  $j = 2, 3, 4$  is set to 0 at  $t = 0$ . There is no point in plotting curves  $\bar{\psi}_j = 0$  in Fig. 3(a).
- The parameter  $\beta$  appears in the equations but its value is not given (unless I am mistaken).

[1] V. Zeitlin, Geophysical Fluid Dynamics: understanding (almost) everything with rotating shallow water models, OUP, 2018
